# Supplementary material for: Primary Role of the Chromophore Bond Length Alternation in Reversible Photoconversion of Red Fluorescence Proteins
Source: PubMed Central journal article supplement — Sci Rep. 2012 Sep 24;2:688. doi: 10.1038/srep00688 (PMC3449290; doi:10.1038/srep00688), 2012-09-24
Supplement: srep00688-s1.pdf [file srep00688-s1.pdf]

## Supplementary Information.

**Supplementary Table.** One-photon absorption, fluorescence, two-photon absorption, and photobleaching properties of red fluorescent proteins.

| No. | Protein      | $\lambda_{\text{abs}}$<br>nm                                                                                         | $\varepsilon(\bar{\nu}_0)$<br>$10^3 \text{ M}^{-1}$<br>$\text{cm}^{-1}$                                                                           | $\sigma_1(532)$<br>$10^{-16} \text{ cm}^2$ | $\lambda_{\text{fl}}$<br>nm                                                                                          | $\tau$<br>ns                                                                                        | $\phi_{\text{fl}}$                                                                                    | $\sigma_2(\bar{\nu}_0)$<br>GM | $\Delta\mu$<br>D | $\phi_{\text{p}}$    | $k_{\text{I}}$<br>( $10^4 \text{ s}^{-1}$ ) | $E_{\text{p}}$<br>kcal/mol | $E_{\text{I}}$<br>kcal/mol |
|-----|--------------|----------------------------------------------------------------------------------------------------------------------|---------------------------------------------------------------------------------------------------------------------------------------------------|--------------------------------------------|----------------------------------------------------------------------------------------------------------------------|-----------------------------------------------------------------------------------------------------|-------------------------------------------------------------------------------------------------------|-------------------------------|------------------|----------------------|---------------------------------------------|----------------------------|----------------------------|
| 1   | mTangerine   | 567 <sup>1</sup><br>568 <sup>2</sup>                                                                                 | <b>50</b><br>35 <sup>1</sup><br>38 <sup>2</sup>                                                                                                   | 1.01                                       | 584 <sup>1</sup><br>585 <sup>2</sup>                                                                                 | 2.53 <sup>1</sup>                                                                                   | 0.22 <sup>1</sup><br>0.30 <sup>2</sup>                                                                | 2.35                          | 1.1              | 2.1x10 <sup>-4</sup> | 8.3                                         | 14.0                       | 10.2                       |
| 2   | mStrawberry  | 576 <sup>1</sup><br>574 <sup>2</sup><br>575 <sup>4</sup>                                                             | <b>66</b><br>60 <sup>1</sup><br>90 <sup>2</sup><br>98 <sup>4</sup>                                                                                | 1.33                                       | 596 <sup>1</sup><br>596 <sup>2</sup><br>594 <sup>4</sup>                                                             | 2.20 <sup>1</sup><br>2.1 <sup>3</sup><br>2.04 <sup>4</sup>                                          | 0.34 <sup>1</sup><br>0.29 <sup>2</sup><br>0.35 <sup>4</sup>                                           | 4.7                           | 1.4              | 4.5x10 <sup>-5</sup> | 2.0                                         | 13.7                       | 10.5                       |
| 3   | mCherry      | 589 <sup>1</sup><br>587 <sup>2</sup><br>587 <sup>6</sup><br>585 <sup>7</sup><br>588 <sup>8</sup><br>586 <sup>4</sup> | <b>71</b><br>74 <sup>1</sup><br>72 <sup>2</sup><br>78 <sup>5</sup><br>71 <sup>6</sup><br>66.4 <sup>7</sup><br>101 <sup>8</sup><br>97 <sup>4</sup> | 0.78                                       | 611 <sup>1</sup><br>610 <sup>2</sup><br>610 <sup>6</sup><br>609 <sup>7</sup><br>611 <sup>8</sup><br>606 <sup>4</sup> | 1.49 <sup>1</sup><br>1.4 <sup>5</sup><br>1.6 <sup>3</sup><br>1.55 <sup>6</sup><br>1.87 <sup>4</sup> | 0.24 <sup>1</sup><br>0.22 <sup>2</sup><br>0.22 <sup>6</sup><br>0.23 <sup>7</sup><br>0.16 <sup>4</sup> | 14                            | 2.2              | 1.3x10 <sup>-5</sup> | 0.88                                        | 12.8                       | 11.4                       |
| 4   | mPlum        | 590 <sup>1</sup><br>590 <sup>9</sup><br>583 <sup>4</sup><br>587 <sup>11</sup>                                        | <b>62</b><br>65 <sup>1</sup><br>41 <sup>9</sup><br>75 <sup>4</sup><br>143 <sup>10</sup><br>29.3 <sup>11</sup><br>22 <sup>5</sup>                  | 0.78                                       | 644 <sup>1</sup><br>649 <sup>9</sup><br>633 <sup>4</sup><br>649 <sup>11</sup>                                        | 0.87 <sup>1</sup>                                                                                   | 0.13 <sup>1</sup><br>0.10 <sup>9</sup><br>0.08 <sup>4</sup><br>0.10 <sup>11</sup>                     | 15                            | 2.6              | 3.8x10 <sup>-6</sup> | 0.44                                        | 12.4                       | 11.8                       |
| 5   | mCherry pH11 | 566 <sup>12</sup>                                                                                                    | <b>66</b><br>72 <sup>13</sup>                                                                                                                     | 1.52                                       | 594 <sup>12</sup>                                                                                                    | 1.94                                                                                                | 0.28                                                                                                  | 30                            | 3.6              | 1.4x10 <sup>-5</sup> | 0.74                                        | 11.3                       | 12.9                       |

|    |                    |                                                                                                                                                            |                                                                                                                      |      |                                                                                                                                                            |                                                                                                                                                                 |                                                                                                       |    |     |                      |      |      |      |
|----|--------------------|------------------------------------------------------------------------------------------------------------------------------------------------------------|----------------------------------------------------------------------------------------------------------------------|------|------------------------------------------------------------------------------------------------------------------------------------------------------------|-----------------------------------------------------------------------------------------------------------------------------------------------------------------|-------------------------------------------------------------------------------------------------------|----|-----|----------------------|------|------|------|
|    |                    | <i>566</i> <sup>14</sup>                                                                                                                                   |                                                                                                                      |      | <i>594</i> <sup>14</sup>                                                                                                                                   |                                                                                                                                                                 |                                                                                                       |    |     |                      |      |      |      |
| 6  | mTangerine/mCherry | 588                                                                                                                                                        | <b>52</b>                                                                                                            | 0.72 | 610                                                                                                                                                        | 1.67                                                                                                                                                            | 0.14                                                                                                  | 27 | 3.8 | 1.5x10 <sup>-5</sup> | 0.91 | 11.1 | 13.1 |
| 7  | DsRed2             | 562 <sup>1</sup><br><i>563</i> <sup>5</sup><br><i>558</i> <sup>2</sup><br><i>558</i> <sup>15</sup><br><i>559</i> <sup>16</sup><br><i>555</i> <sup>17</sup> | <b>106</b><br><i>86</i> <sup>1</sup><br><i>65</i> <sup>5</sup><br><i>75</i> <sup>2</sup><br><i>150</i> <sup>15</sup> | 1.83 | 587 <sup>1</sup><br><i>587</i> <sup>5</sup><br><i>583</i> <sup>2</sup><br><i>583</i> <sup>15</sup><br><i>586</i> <sup>16</sup><br><i>586</i> <sup>17</sup> | 3.44 <sup>1</sup><br><i>3.67</i> <sup>16</sup><br><i>3.60</i> <sup>17</sup><br><i>3.3</i> <sup>18</sup><br><i>3.6</i> <sup>19</sup><br><i>3.6</i> <sup>19</sup> | 0.71 <sup>1</sup><br><i>0.55</i> <sup>5</sup><br><i>0.79</i> <sup>2</sup><br><i>0.7</i> <sup>15</sup> | 58 | 3.9 | 7.1x10 <sup>-5</sup> | 2.1  | 11.0 | 13.2 |
| 8  | mStrawberry pH11   | 551<br><i>548</i> <sup>14</sup>                                                                                                                            | <b>72</b>                                                                                                            | 1.90 | 567<br><i>565</i> <sup>14</sup>                                                                                                                            | 2.77                                                                                                                                                            | 0.39                                                                                                  | 40 | 4.0 | 5.2x10 <sup>-5</sup> | 1.9  | 10.9 | 13.3 |
| 9  | mBanana/mTangerine | 569                                                                                                                                                        | <b>57</b>                                                                                                            | 1.14 | 587                                                                                                                                                        | 1.49                                                                                                                                                            | 0.16                                                                                                  | 36 | 4.3 | 6.1x10 <sup>-5</sup> | 4.1  | 10.6 | 13.6 |
| 10 | mStrawberry/DsRed2 | 584                                                                                                                                                        | <b>54</b>                                                                                                            | 0.82 | 606                                                                                                                                                        | 2.07                                                                                                                                                            | 0.18                                                                                                  | 36 | 4.3 | 4.8x10 <sup>-5</sup> | 2.3  | 10.6 | 13.6 |
| 11 | mBanana            | 541 <sup>1</sup><br><i>540</i> <sup>2</sup>                                                                                                                | <b>82</b><br><i>73</i> <sup>1</sup><br><i>6.0</i> <sup>2</sup>                                                       | 2.71 | 555 <sup>1</sup><br><i>553</i> <sup>2</sup>                                                                                                                | 3.23 <sup>1</sup>                                                                                                                                               | 0.69 <sup>1</sup><br><i>0.70</i>                                                                      | 63 | 4.8 | 3.1x10 <sup>-4</sup> | 9.7  | 10.0 | 14.2 |
| 12 | tdTomato/DsRed2    | 568                                                                                                                                                        | <b>52</b>                                                                                                            | 1.02 | 591                                                                                                                                                        | 2.78                                                                                                                                                            | 0.25                                                                                                  | 43 | 4.9 | 5.1x10 <sup>-5</sup> | 18   | 9.9  | 14.3 |
| 13 | mCherry/tdTomato   | 586                                                                                                                                                        | <b>85</b>                                                                                                            | 1.28 | 608                                                                                                                                                        | 0.29                                                                                                                                                            | 0.029                                                                                                 | 78 | 5.0 | 2.7x10 <sup>-5</sup> | 9.2  | 9.8  | 14.4 |

One-photon absorption maximum wavelength ( $\lambda_{\text{abs}}$ ), extinction coefficient ( $\epsilon(\bar{\nu}_0)$ ), cross section at 532 nm ( $\sigma_1(532)$ ); fluorescence maximum wavelength ( $\lambda_{\text{fl}}$ ), lifetime ( $\tau$ ), and quantum yield ( $\phi_{\text{fl}}$ ); two-photon absorption cross section  $\sigma_2(\bar{\nu}_0)$ , corresponding to the maximum of the long-wavelength fitting component (see main text and Supplementary Figs 1-13), change of permanent dipole moment upon excitation  $\Delta\mu$ ; quantum efficiency of the first step of photobleaching,  $\phi_p$ , monomolecular rate constant of the first step of photobleaching,  $k_1$ , and the activation energies for the P- and I-rotations in the excited state,  $E_P$  and  $E_I$ , respectively. The first line for each protein corresponds to the values obtained either in this paper or in<sup>1</sup> and used for the interpretation. Other available literature data are presented in the next rows and shown by italic. All extinction coefficients are obtained by alkaline denaturation method, except for those from refs<sup>1,13</sup>, which were obtained by using the Strickler-Berg method<sup>1</sup>.

**Supplementary Fig. 1.** Two-photon absorption spectra of red FPs. For each protein, the two-photon absorption spectrum (open circles) is fitted to the sum of two one-photon excitation spectra (red dashed line): one non-shifted (blue line) with variable amplitude and another – shifted to higher frequencies (green line) with variable shift and amplitude (see Methods for details). The black arrow depicts the value of two-photon cross section  $\sigma_2(\bar{\nu}_0)$  which was used in calculation of the permanent dipole moments difference.

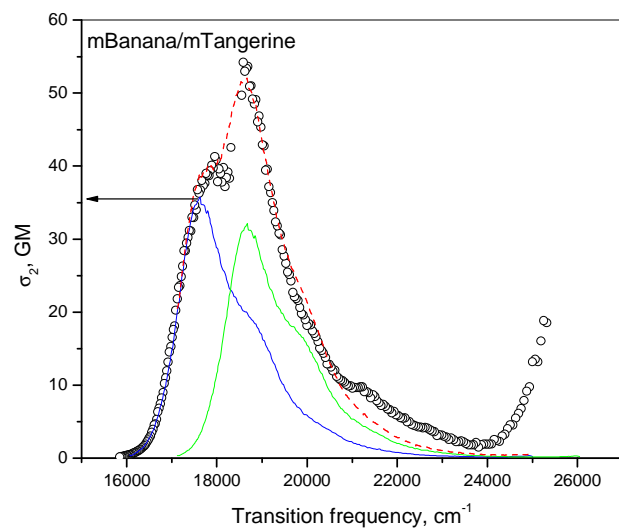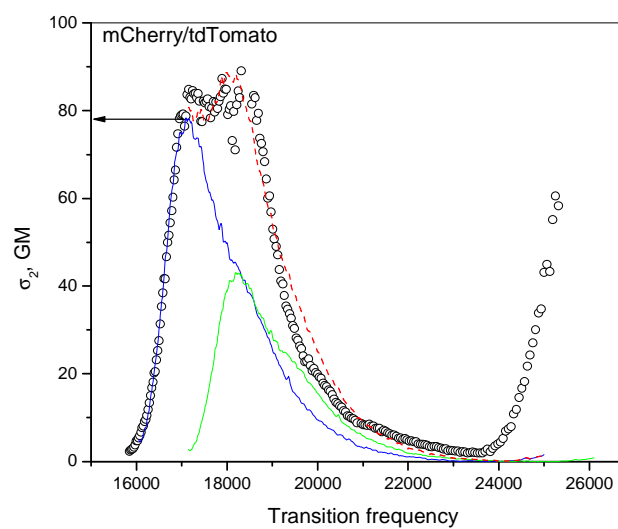

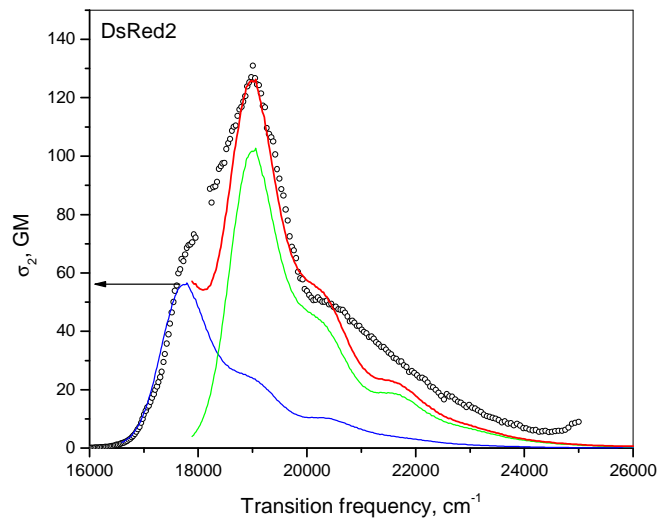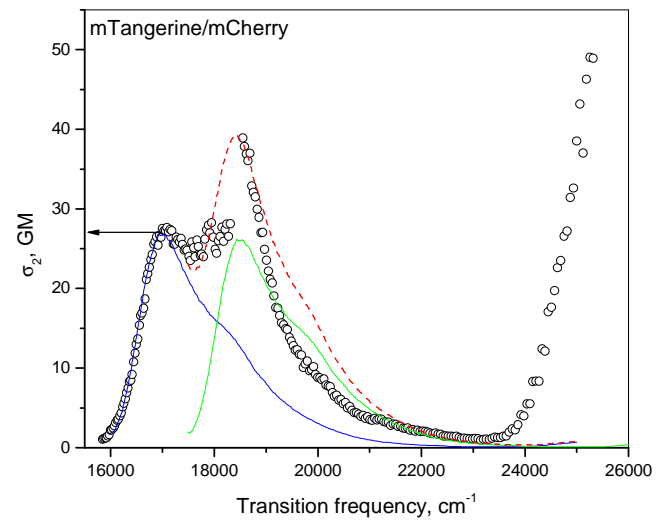

1

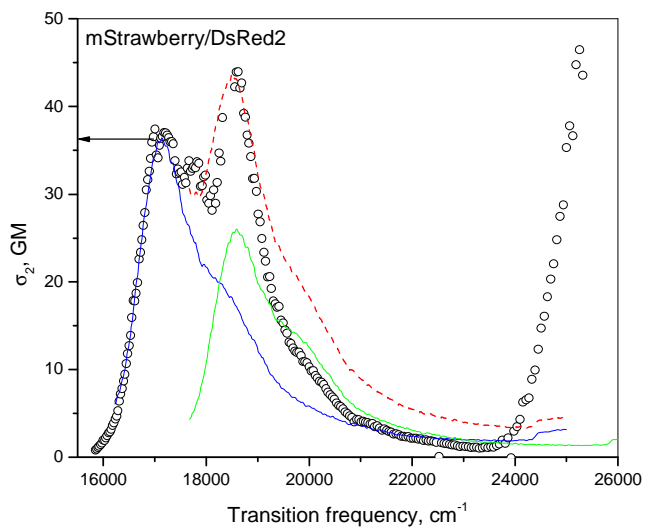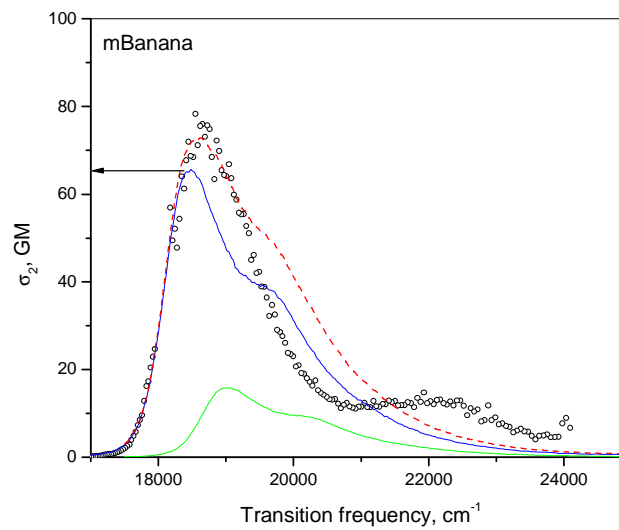

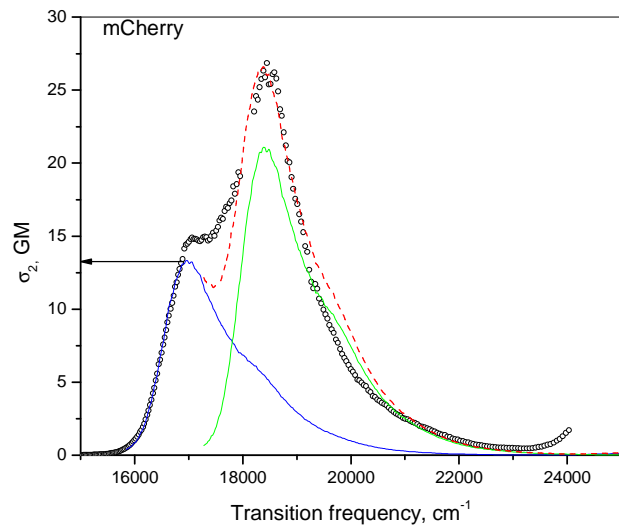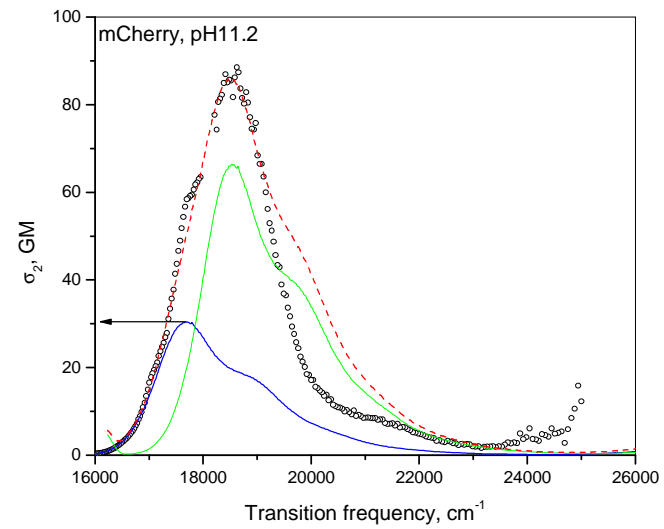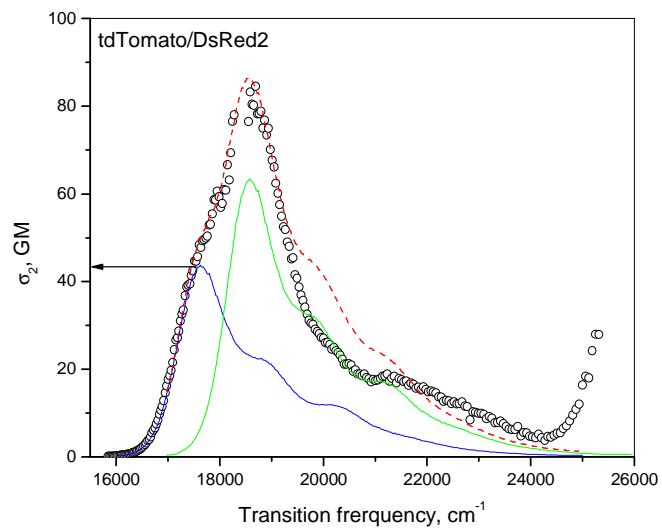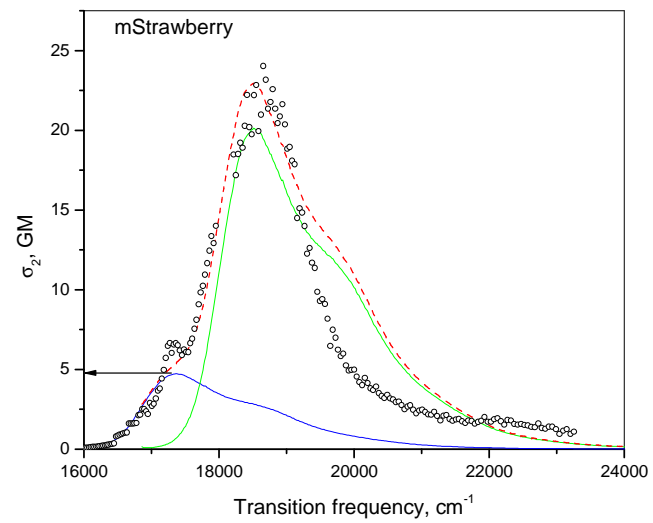

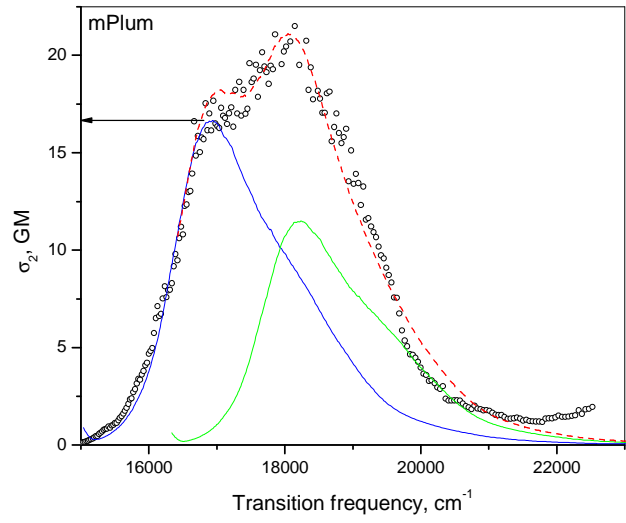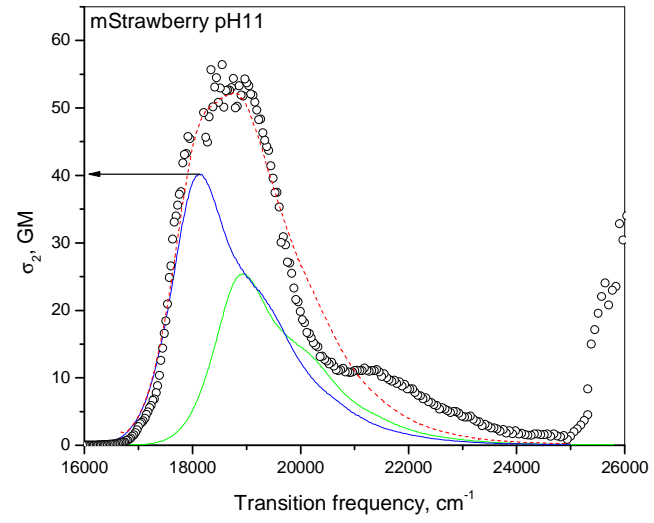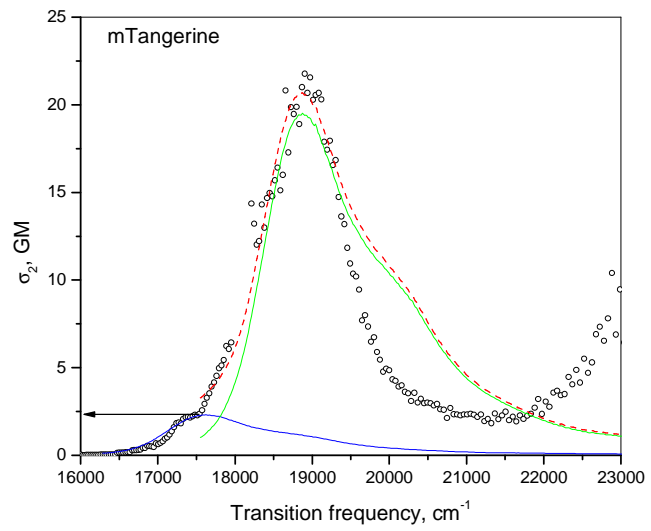

**Supplementary Fig. 2.** Fluorescence intensity (symbols) versus time in course of photobleaching of Rhodamine 6G in dimethylformamide with the cw laser at 532 nm,  $P = 1 \text{ W/cm}^2$ . The mono-exponential fit (with zero background) is shown by red line.

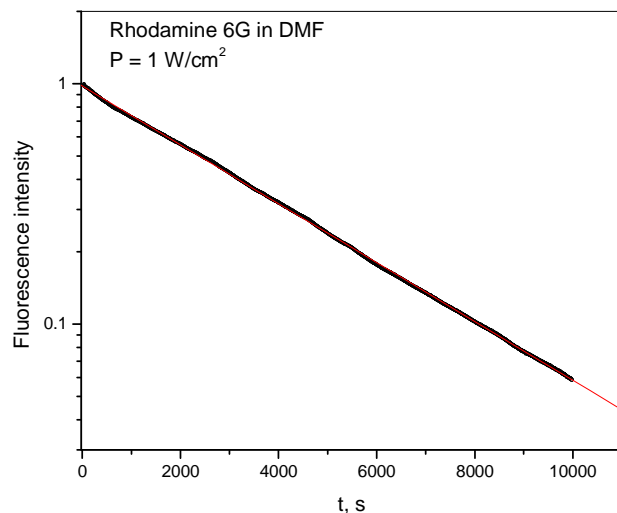

### Supplementary References

1. Drobizhev, M., Makarov, N. S., Tillo, S., Hughes, T. E. & Rebane, A. Two-photon absorption properties of fluorescent proteins. *Nature Meth.* **8**, 393-399 (2011).
2. Shaner, N. C., *et al.* Improved monomeric red, orange and yellow fluorescent proteins derived from *Discosoma* sp. Red fluorescent protein. *Nature Biotechnol.* **22**, 1567-1572 (2004).
3. Hendrix, J., Flors, C., Dedecker, P., Hofkens, J. & Engelborghs, Y. Dark states in monomeric red fluorescent proteins studied by fluorescence correlation and single molecule spectroscopy. *Biophys. J.* **94**, 4103-4113 (2008).
4. Dean, K. D. , Lubeck, J. L., Binder, J. K., Schwall, L. R., Jimenez, R., Palmer, A. E. Analysis of red-fluorescent proteins provides insight into dark-state conversion and photodegradation. *Biophys. J.* **101**, 961-969 (2011).
5. Merzlyak, E. M. *et al.* Bright monomeric red fluorescent protein with an extended fluorescence lifetime. *Nat. Methods* **4**, 555-557 (2007).

6. Medintz, I. L. *et al.* Resonance energy transfer between luminescent quantum dots and diverse fluorescent protein acceptors. *J. Phys. Chem. C* **113**, 18552-18561 (2009).
7. Strack, R. L. *et al.* A noncytotoxic DsRed variant for whole-cell labeling. *Nat Methods* **5**, 955-957 (2008).
8. Chica, R., Moore, M. M., Allen, B. D., Mayo, S. L. Generation of longer emission wavelength red fluorescent proteins using computationally designed libraries. *Proc. Nat. Acad. Sci. U. S. A.* **107**, 20257-20262 (2010).
9. Wang, L., Jackson, W. C., Steinbach, P. A. & Tsien, R. Y. Evolution of new nonantibody proteins via iterative somatic hypermutation. *Proc. Nat. Acad. Sci. U. S. A.* **101**, 16745-16749 (2004).
10. Kredel, S. *et al.* Optimized and far-red-emitting variants of fluorescent protein eqFR611. *Chem. Biol.* **15**, 224-233 (2008).
11. Strack, R. L., Hein, B., Bhattacharyya, D., Hell, S. W., *et al.* A rapidly maturing far-red derivative of DsRed-Express2 for whole-cell labeling. *Biochem* **48**, 8279-8281 (2009).
12. Drobizhev, M., Tillo, S., Makarov, N. S., Hughes, T. E. & Rebane, A. Color Hues in red fluorescent proteins are due to internal quadratic Stark effect. *J. Phys. Chem. B* **113**, 12860-12864 (2009).
13. Drobizhev, M., Makarov, N. S., Tillo, S., Hughes, T. E. & Rebane, A. Describing two-photon absorptivity of fluorescent proteins with a new vibronic coupling mechanism. *J. Phys. Chem. B* **116**, 1736-1744 (2012).
14. Shu, X., Shaner, N. C., Yarbrough, C. A., Tsien, R. Y. & Remington S. J. Novel chromophores and buried charges control color in mFruits. *Biochem.* **45**, 9639-9647 (2006).
15. Gross, L. A., Baird, G. S., Hoffman, R. C., Baldrige, K. K. & Tsien, R. Y. The structure of the chromophore within DsRed a red fluorescent protein from coral. *Proc. Natl. Acad. Sci. USA* **97**, 11990-11995 (2000).
16. Heikal, A. A., Hess, S. T. Baird, G. S., Tsien, R. Y. & Webb, W. W. Molecular spectroscopy and dynamics of intrinsically fluorescent proteins: Coral red (dsRed) and yellow (Citrine). *Proc. Nat. Acad. Sci. U. S. A.* **97**, 11996-12001 (2000).
17. Cotlet, M. *et al.* Identification of different emitting species in the red fluorescent protein DsRed by means of ensemble and single-molecule spectroscopy. *Proc. Natl. Acad. Sci. U. S. A.* **98**, 14398-14403 (2001).
18. Bowen, B. & Woodbury, N. Single-molecule fluorescence lifetime and anisotropy measurements of the red fluorescent protein, DsRed, in solution. *Photochem Photobiol* **77**, 362-369 (2003).
19. Stepanenko, O. V., Verkhusha, V. V., Kazakov, V. I., Shavlovsky, M. M., *et al.* Comparative studies on the structure and stability of fluorescent proteins EGFP, zFP506, mRFP1, "dimer2", and DsRed1. *Biochem* **43**, 14913-14923 (2004).
20. Lounis, B., Deich, J., Rosell, F. I., Boxer, S. G., Moerner, W. E. Ohotophysics of DsRed, a red fluorescent protein, from the ensemble to the single-molecule level. *J. Phys. Chem. B*, **105**, 5048-5054 (2001).
